# Supplementary material for: Carbon Nanodots for On Demand Chemophotothermal Therapy Combination to Elicit Necroptosis: Overcoming Apoptosis Resistance in Breast Cancer Cell Lines
Source: PubMed Central journal article supplement (PMC7692354; doi:10.3390/cancers12113114), 2020-10-25
Supplement: cancers-12-03114-s001.pdf [file cancers-12-03114-s001.pdf]

# Supplementary Materials: Carbon Nanodots for On Demand Chemo-photothermal Therapy Combination to Elicit Necroptosis: Overcoming Apoptosis Resistance in Breast Cancer Cell Lines

Aldo Nicosia, Gennara Cavallaro, Salvatore Costa, Mara Andrea Utzeri, Angela Cuttitta, Gaetano Giammona and Nicolò Mauro

Table S1. and oligonucleotide primers used in this study.

| Gene name                                       | Gene symbol                       | Accession Number | Primer sequence (5' – 3')                           |
|-------------------------------------------------|-----------------------------------|------------------|-----------------------------------------------------|
| Apoptotic peptidase activating factor 1         | <i>APAF1</i>                      | NM_001160        | GCCAAGCAGGAGGTCGATAATG<br>GACCATCCTCAGAAAAGCAGGC    |
| ATG12 autophagy related 12 homolog              | <i>ATG12</i>                      | NM_004707        | GGGAAGGACTTACGGATGTCTC<br>AGGAGTGTCTCCACAGCCTTT     |
| ATG3 autophagy related 3 homolog                | <i>ATG3</i>                       | NM_022488        | ACTGATGCTGGCGGTGAAGATG<br>GTGCTCAACTGTAAAGGCTGCC    |
| ATG5 autophagy related 5 homolog                | <i>ATG5</i>                       | NM_004849        | GCAGATGGACAGTTGCACACAC<br>GAGGTGTTTCCAACATTGGCTCA   |
| ATG7 autophagy related 7 homolog                | <i>ATG7</i>                       | NM_006395        | CGTTGCCACAGCATCATCTTC<br>CACTGAGGTTACCATCCTTGG      |
| BCL2-associated X protein                       | <i>BAX</i>                        | NM_004324        | TCAGGATGCGTCCACCAAGAAG<br>TGTGTCCACGGCGGCAATCATC    |
| B-cell CLL/lymphoma 2                           | <i>BCL2</i>                       | NM_000633        | ATCGCCCTGTGGATGACTGAGT<br>GCCAGGAGAAATCAAACAGAGGC   |
| BCL2-related protein A1                         | <i>BCL2A1</i><br>( <i>BFL1</i> )  | NM_004049        | GGATAAGGCAAAAACGGAGGCTG<br>CAGTATTGCTTCAGGAGAGATAGC |
| BCL2-like 1                                     | <i>BCL2L1</i><br>( <i>BCLXL</i> ) | NM_138578        | GCCACTTACCTGAATGACCACC<br>AACCAGCGGTTGAAGCGTTCCT    |
| BCL2-like 11 (apoptosis facilitator)            | <i>BCL2L11</i>                    | NM_006538        | CAAGAGTTGCGGCGTATTGGAG<br>ACACCAGGCGGACAATGTAACG    |
| Beclin 1, autophagy related                     | <i>BECN1</i>                      | NM_003766        | CTGGACACTCAGCTCAACGTCA<br>CTCTAGTGCCAGTCTCTTTAGC    |
| Bcl2 modifying factor                           | <i>BMF</i>                        | NM_033503        | CAGTGGCAACATCAAGCAGAGG<br>GCAAGGTTGTGCAGGAAGAGGA    |
| Caspase 2, apoptosis-related cysteine peptidase | <i>CASP2</i>                      | NM_032982        | TGCCTTCTGTGAAGCACTGAGG<br>CGGAAAAGGGAGACTCAAGTCCG   |
| Caspase 3, apoptosis-related cysteine peptidase | <i>CASP3</i>                      | NM_004346        | GGAAGCGAATCAATGGACTCTGG<br>GCATCGACATCTGTACCAGACC   |
| Caspase 7, apoptosis-related cysteine peptidase | <i>CASP7</i>                      | NM_001227        | CGGAACAGACAAAGATGCCGAG<br>AGGCGGCATTTGTATGGTCTCTC   |
| Caspase 9, apoptosis-related cysteine peptidase | <i>CASP9</i>                      | NM_001229        | GTTTGAGGACCTTCGACCAGCT<br>CAACGTACCAGGAGCCACTCTT    |
| COMM domain containing 4                        | <i>COMMD4</i>                     | NM_017828        | CAGTGCTGAGTTTCATCCTCTCC<br>TGCTTCTCCTCATAACAGCGGC   |
| Cylindromatosis (turban tumor syndrome)         | <i>CYLD</i>                       | NM_015247        | GGTAATCCGTTGGATCGGTCCAG<br>AGTGCCTCTGAAGGTTCCATCC   |
| Eukaryotic translation initiation factor 5B     | <i>EIF5B</i>                      | NM_015904        | AACGGAGGATTGAGAAACGGCG<br>TTCCCTGTGTCCACATGCCCAA    |
| Fas (TNF receptor superfamily, member 6)        | <i>FAS(TNFR SF6)</i>              | NM_000043        | GGACCCAGAATACCAAGTGCAG<br>GTTGCTGGTGAGTGTGCATTCC    |
| UDP-N-acetyl-alpha-D-galactosamine:polypeptide  | <i>GALNT5</i>                     | NM_014568        | CCAGTGGATAGAGCCATTGAAGA<br>TCTCAGGAGAGTGGACCACACT   |

|                                                               |                      |           |                                                   |
|---------------------------------------------------------------|----------------------|-----------|---------------------------------------------------|
| N-acetylgalactosaminyltransferase 5<br>(GalNAc-T5)            |                      |           |                                                   |
| Microtubule-associated protein 1 light chain 3 alpha          | <i>MAP1LC3A</i>      | NM_181509 | GCTACAAGGGTGAGAAGCAGCTCTGGTTCACCAGCAGGAAGAAG      |
| Myeloid cell leukemia sequence 1 (BCL2-related)               | <i>MCL1</i>          | NM_021960 | CCAAGAAAGCTGCATCGAACCATCAGCACATTCTGATGCCACCT      |
| Poly (ADP-ribose) polymerase 1                                | <i>PARP1(ADPRT1)</i> | NM_001618 | CCAAGCCAGTTCAGGACCTCATGGATCTGCCTTTTGCTCAGCTTC     |
| Poly (ADP-ribose) polymerase 2                                | <i>PARP2</i>         | NM_005484 | GGTGGCTTGTTCAAGCAATCTC<br>GGTGGCATAGTCCATCTGTAGC  |
| Phosphoinositide-3-kinase, class 3                            | <i>PIK3C3(VPS34)</i> | NM_002647 | GCGTTCCTTGCTGGCTGCACAA<br>CTCCAAGCAATGCCTGTAGTCTC |
| RAB25, member RAS oncogene family                             | <i>RAB25</i>         | NM_020387 | ACTGCTCTTCTGGAGACCTCA<br>GCTGTTCTGTCTCTGCTTGGAC   |
| Transmembrane protein 57                                      | <i>TMEM57</i>        | NM_018202 | CTGAGCAGGAAGCCCGAAGTTT<br>CGATTCCGTAAGGTTTCGGTGC  |
| Tumor necrosis factor                                         | <i>TNFα</i>          | NM_000594 | CTCTTCTGCCTGCTGCACTTTG<br>ATGGGCTACAGGCTTGTCACTC  |
| Human receptor (TNFRSF)-interacting serine-threonine kinase 1 | <i>RIPK1</i>         | NM_003804 | TATCCCAGTGCCTGAGACCAAC<br>GTAGGCTCCAATCTGAATGCCAG |
| (Myc-DDK-tagged)-Human solute carrier family 25               | <i>SLC25A4</i>       | NM_001151 | GCTGCCTACTTCGGAGTCTATG<br>TGCGACTGCCGTCACTCTG     |
| beta Actin                                                    | <i>ACTB</i>          | NM_001101 | CACCATTGGCAATGAGCGGTTT<br>AGGTCTTTGCGGATGTCCACGT  |
| glyceraldehyde-3-phosphate dehydrogenase                      | <i>GAPDH</i>         | NM_002046 | GTCTCCTCTGACTTCAACAGCG<br>ACCACCCTGTTGCTGTAGCCAA  |
| 18S ribosomal RNA                                             | <i>18S</i>           | M10098.1  | CGGCTACCACATCCAAGGAA<br>CTGGAATTACCGCGGCT         |

**Table S2.** Statistical analyses by t Student's of RT-qPCR analyses in MDA-MB-231 cell line, *p* values less than 0.05 are indicated by \* and considered statistically significant.

|                | ESR<br>NIR <sub>50</sub> |               | ESR<br>NIR <sub>200</sub> |               | LSR<br>NIR <sub>50</sub> |               | LSR<br>NIR <sub>200</sub> |               |
|----------------|--------------------------|---------------|---------------------------|---------------|--------------------------|---------------|---------------------------|---------------|
|                | CDs-PEG-BT               | CDs-PEG-BT/IT | CDs-PEG-BT                | CDs-PEG-BT/IT | CDs-PEG-BT               | CDs-PEG-BT/IT | CDs-PEG-BT                | CDs-PEG-BT/IT |
| <i>APAF1</i>   |                          |               | *                         | *             |                          | *             |                           |               |
| <i>ATG12</i>   | *                        | *             | *                         | *             | *                        | *             | *                         | *             |
| <i>ATG3</i>    |                          |               | *                         | *             | *                        |               |                           |               |
| <i>ATG5</i>    | *                        | *             | *                         | *             | *                        | *             |                           | *             |
| <i>ATG7</i>    | *                        | *             | *                         | *             | *                        | *             |                           | *             |
| <i>BAX</i>     |                          |               | *                         | *             |                          |               |                           | *             |
| <i>BCL2</i>    | *                        | *             | *                         | *             | *                        | *             | *                         | *             |
| <i>BCL2A1</i>  | *                        | *             | *                         | *             | *                        |               |                           | *             |
| <i>BCL2L1</i>  | *                        | *             |                           |               | *                        |               | *                         | *             |
| <i>BCL2L11</i> | *                        | *             | *                         | *             | *                        | *             | *                         | *             |
| <i>BECN1</i>   | *                        | *             | *                         | *             | *                        | *             | *                         | *             |
| <i>BMF</i>     | *                        | *             |                           | *             |                          | *             |                           | *             |
| <i>CASP2</i>   |                          |               |                           |               | *                        |               | *                         | *             |



|                               |   |   |   |   |   |   |   |   |   |   |
|-------------------------------|---|---|---|---|---|---|---|---|---|---|
| <i>MAP1LC3A</i>               |   |   |   | * | * | * |   | * |   | * |
| <i>MCL1</i>                   |   | * |   | * | * | * | * | * |   | * |
| <i>PARP1</i>                  | * | * |   | * | * | * |   | * |   | * |
| <i>PARP2</i>                  |   | * |   | * |   | * | * |   | * | * |
| <i>PIK3C3</i>                 | * | * | * | * |   | * | * | * | * | * |
| <i>RAB25</i>                  |   | * |   | * | * |   |   | * |   | * |
| <i>TMEM57</i>                 |   | * |   | * | * |   |   | * |   | * |
| <i>TNF<math>\alpha</math></i> | * | * | * | * | * | * | * | * | * | * |
| <i>RIPK1</i>                  | * | * |   | * | * | * |   | * | * | * |
| <i>SLC25A4</i>                | * | * | * | * |   |   | * | * | * | * |

---
